# Supplementary material for: Transcriptome Characterization for Non-Model Endangered Lycaenids, Protantigius superans and Spindasis takanosis, Using Illumina HiSeq 2500 Sequencing
Source: MDPI journal article supplement (doi:10.3390/ijms161226213), 2015-12-16
Supplement: s1 [file s1]

# Supplementary Material: Transcriptome Characterization for Non-Model Endangered Lycaenids, *Protantigius superans* and *Spindasis takanosis*, Using Illumina HiSeq 2500 Sequencing

Bharat Bhusan Patnaik, Hee-Ju Hwang, Se Won Kang, So Young Park, Tae Hun Wang, Eun Bi Park, Jong Min Chung, Dae Kwon Song, Changmu Kim, Soonok Kim, Jae Bong Lee, Heon Cheon Jeong, Hong Seog Park, Yeon Soo Han and Yong Seok Lee

**Table S1.** Summary of raw read processing and assembly parameters after Illumina HiSeq 2500 sequencing of *S. takanosis* and *P. superans* transcriptome. The thinning and trimming analyses for the raw reads was done with Cutadapt program.

| Data Processing Parameters         | <i>Spindasis takanosis</i> | <i>Protantigius superans</i> |
|------------------------------------|----------------------------|------------------------------|
| Raw reads                          |                            |                              |
| Number of sequences                | 249,312,792                | 258,875,070                  |
| Number of bases                    | 31,413,411,792             | 32,618,258,820               |
| Total read pairs processed         | 124,656,396                | 129,437,535                  |
| Read 1 with adaptor                | 5,558,289 (4.5%)           | 5,851,738 (4.5%)             |
| Read 2 with adaptor                | 7,370,351 (5.9%)           | 7,136,093 (5.5%)             |
| Pairs written (passing filters)    | 124,656,396                | 129,437,535                  |
| Total base pairs processed (bp)    | 31,413,411,792             | 32,618,258,820               |
| Read 1 (bp)                        | 15,706,705,896             | 16,309,129,410               |
| Read 2 (bp)                        | 15,706,705,896             | 16,309,129,410               |
| Total base pairs filtered (bp)     | 31,304,793,937             | 32,514,410,974               |
| Read 1 (bp)                        | 15,655,212,070             | 16,259,148,797               |
| Read 2 (bp)                        | 15,649,581,867             | 16,255,262,177               |
| % of reads after trimming          | 99.65                      | 99.68                        |
| % of reads discarded               | 0.35                       | 0.32                         |
| Average length after trimming (bp) | 125.6                      | 125.6                        |

Adaptor 1 sequence: AGATCGGAAGAGCACACGTCTGAACTCCAGTCAC; Adaptor 2 sequence: AGATCGGAAGAGCGTCGTAGGGAAAGAGTGTAGATCTCGGTGGTCGCCGTATCATT.

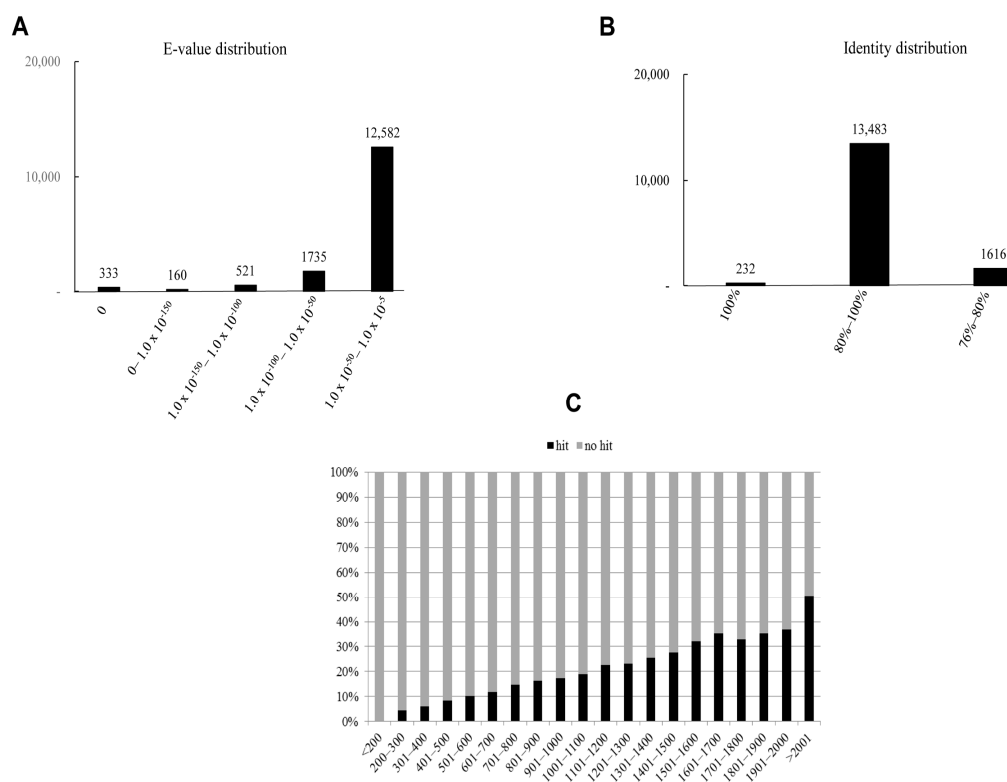

**Figure S1.** Characteristics of homology search of assembled sequences of *P. superans* against Unigene DB. (A) E-value distribution of BLAST hits for assembled sequences with a cutoff value of  $1.0 \times 10^{-5}$ ; (B) Identity distribution of BLAST hits for each assembled sequence; (C) Comparison of the length of assembled sequences with or without hits.

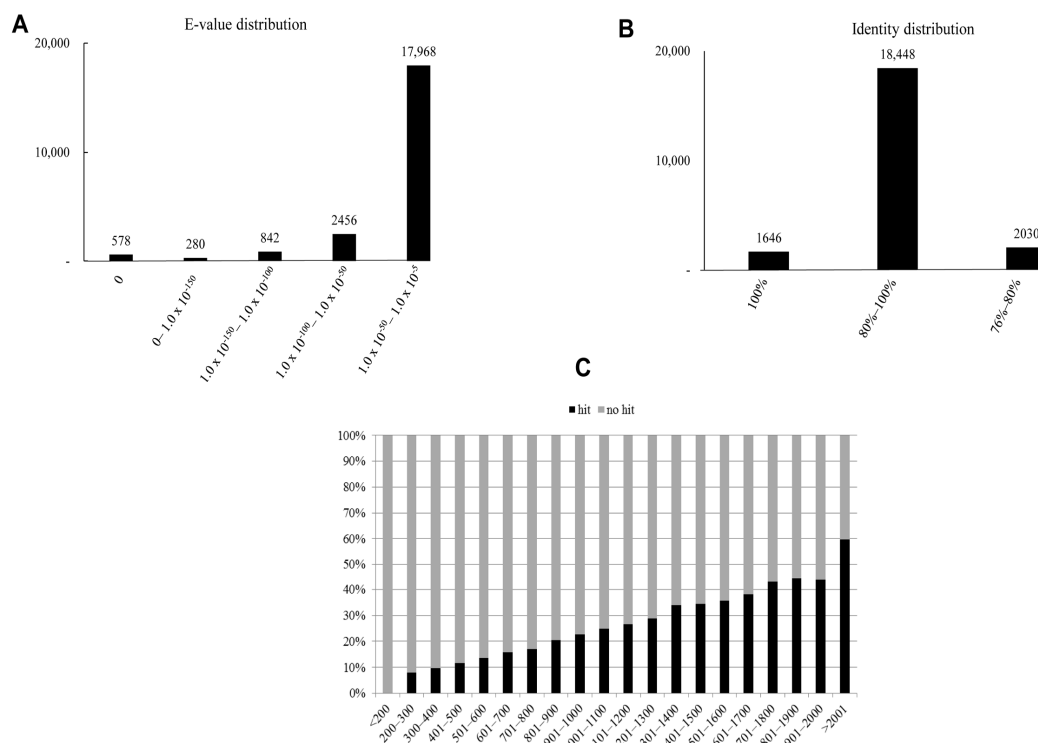

**Figure S2.** Characteristics of homology search of assembled sequences of *S. takanosis* against Unigene DB. (A) E-value distribution of BLAST hits for assembled sequences with a cutoff value of  $1.0 \times 10^{-5}$ ; (B) Identity distribution of BLAST hits for each assembled sequence; (C) Comparison of the length of assembled sequences with or without hits.

**Table S2.** List of the top-hit 40 Interpro domains in *P. superans* transcriptome.

| Interpro Domain | Description                                                | Unigenes |
|-----------------|------------------------------------------------------------|----------|
| IPR007087       | Zinc finger, C2H2 domain                                   | 609      |
| IPR001254       | Serine proteases, trypsin domain                           | 262      |
| IPR000719       | Protein kinase domain                                      | 252      |
| IPR007588       | Zinc finger, FLYWCH-type                                   | 235      |
| IPR000477       | Reverse transcriptase domain                               | 210      |
| IPR001680       | WD40 repeat                                                | 172      |
| IPR000504       | RNA recognition motif domain                               | 170      |
| IPR005828       | Major facilitator, sugar transporter-like family           | 126      |
| IPR011701       | Major facilitator superfamily                              | 123      |
| IPR001611       | Leucine-rich repeat                                        | 121      |
| IPR001128       | Cytochrome P450 family                                     | 113      |
| IPR005135       | Endonuclease/exonuclease/phosphatase domain                | 108      |
| IPR003598       | Immunoglobulin subtype 2 domain                            | 106      |
| IPR011989       | Armadillo-like helical domain                              | 106      |
| IPR002048       | EF-hand domain                                             | 104      |
| IPR003439       | ABC transporter-like domain                                | 99       |
| IPR002110       | Ankyrin repeat                                             | 98       |
| IPR002018       | Carboxylesterase, type B domain                            | 93       |
| IPR000210       | BTB/POZ domain                                             | 89       |
| IPR000618       | Insect cuticle protein family                              | 89       |
| IPR012337       | Ribonuclease H-like domain                                 | 84       |
| IPR029526       | PiggyBac transposable element-derived protein domain       | 76       |
| IPR000276       | G protein-coupled receptor, rhodopsin-like family          | 74       |
| IPR002198       | Short-chain dehydrogenase/reductase SDR family             | 72       |
| IPR006578       | MADF domain                                                | 71       |
| IPR001806       | Small GTPase superfamily                                   | 70       |
| IPR001841       | Zinc finger, RING-type domain                              | 70       |
| IPR000742       | EGF-like domain                                            | 69       |
| IPR002213       | UDP-glucuronosyl/UDP-glucosyltransferase family            | 69       |
| IPR020846       | Major facilitator superfamily domain                       | 66       |
| IPR001478       | PDZ domain                                                 | 65       |
| IPR001452       | SH3 domain                                                 | 64       |
| IPR007110       | Immunoglobulin-like domain                                 | 64       |
| IPR011990       | Tetratricopeptide-like helical domain                      | 62       |
| IPR000008       | C2 domain                                                  | 61       |
| IPR027417       | P-loop containing nucleoside triphosphate hydrolase domain | 61       |
| IPR027806       | Harbinger transposase-derived nuclease domain              | 54       |
| IPR006612       | Zinc finger, C2CH-type domain                              | 53       |
| IPR013057       | Amino acid transporter, transmembrane domain               | 53       |
| IPR003961       | Fibronectin type III domain                                | 52       |

**Table S3.** List of top-hit 40 Interpro domains in *S. takanosis* transcriptome.

| Interpro Domain | Description                                                                   | Unigenes |
|-----------------|-------------------------------------------------------------------------------|----------|
| IPR015880       | Zinc finger, C2H2-like domain                                                 | 425      |
| IPR027417       | P-loop containing nucleoside triphosphate hydrolase domain                    | 283      |
| IPR000477       | Reverse transcriptase domain                                                  | 264      |
| IPR002290       | Serine/threonine/dual specificity protein kinase, catalytic domain            | 205      |
| IPR000504       | RNA recognition motif domain                                                  | 204      |
| IPR001680       | WD40 repeat                                                                   | 186      |
| IPR007588       | Zinc finger, FLYWCH-type domain                                               | 182      |
| IPR011701       | Major facilitator superfamily                                                 | 159      |
| IPR029058       | Alpha/Beta hydrolase fold domain                                              | 157      |
| IPR005135       | Endonuclease/exonuclease/phosphatase domain                                   | 149      |
| IPR001314       | Peptidase S1A, chymotrypsin-type family                                       | 146      |
| IPR005828       | Major facilitator, sugar transporter-like family                              | 146      |
| IPR012337       | Ribonuclease H-like domain                                                    | 145      |
| IPR011989       | Armadillo-like helical domain                                                 | 144      |
| IPR002110       | Ankyrin repeat                                                                | 142      |
| IPR013783       | Immunoglobulin-like fold domain                                               | 140      |
| IPR001304       | C-type lectin domain                                                          | 136      |
| IPR002048       | EF-hand domain                                                                | 136      |
| IPR016040       | NAD(P)-binding domain                                                         | 127      |
| IPR003593       | AAA+ ATPase domain                                                            | 125      |
| IPR001254       | Serine proteases, trypsin domain                                              | 119      |
| IPR001128       | Cytochrome P450 family                                                        | 118      |
| IPR001478       | PDZ domain                                                                    | 106      |
| IPR015943       | WD40/YVTN repeat-like-containing domain                                       | 100      |
| IPR029526       | PiggyBac transposable element-derived protein domain                          | 98       |
| IPR000276       | G protein-coupled receptor, rhodopsin-like family                             | 97       |
| IPR011992       | EF-hand domain pair domain                                                    | 96       |
| IPR029063       | S-adenosyl-L-methionine-dependent methyltransferase domain                    | 96       |
| IPR003599       | Immunoglobulin subtype domain                                                 | 93       |
| IPR003591       | Leucine-rich repeat, typical subtype repeat                                   | 86       |
| IPR002126       | Cadherin domain                                                               | 85       |
| IPR003598       | Immunoglobulin subtype 2 domain                                               | 85       |
| IPR019734       | Tetratricopeptide repeat                                                      | 84       |
| IPR002557       | Chitin binding domain                                                         | 83       |
| IPR001452       | SH3 domain                                                                    | 81       |
| IPR005055       | Insect odorant-binding protein A10/Ejaculatory bulb-specific protein 3 family | 79       |
| IPR002347       | Glucose/ribitol dehydrogenase family                                          | 78       |
| IPR000742       | EGF-like domain                                                               | 77       |
| IPR001841       | Zinc finger, RING-type domain                                                 | 77       |
| IPR012336       | Thioredoxin-like fold domain                                                  | 76       |
